# Supplementary material for: One-chip analog circuits for a new type of plasma wave receiver on board space missions
Source: Copernicus journal article supplement (doi:10.5194/gi-6-159-2017), 2017-03-31
Supplement: Supplementary file 1 [file gi-6-159-2017-supplement.zip]

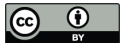

## *Supplement of*

# **One-chip analog circuits for a new type of plasma wave receiver on board space missions**

**Takahiro Zushi et al.**

*Correspondence to:* Hirotugu Kojima ([kojima.hirotugu.6m@kyoto-u.ac.jp](mailto:kojima.hirotugu.6m@kyoto-u.ac.jp))

- gi-6-159-2017-supplement-title-page.pdf
- raw\_data
  - figure11
    - \* 100\_0.002\_spectrum.csv
  - figure7
    - \* freqres\_band1\_0dB\_10-1k.txt
    - \* freqres\_band1\_0dB\_100k-1M.txt
    - \* freqres\_band1\_0dB\_10k-100k.txt
    - \* freqres\_band1\_0dB\_1k-10k.txt
    - \* freqres\_band1\_20dB\_10-1k.txt
    - \* freqres\_band1\_20dB\_100k-1M.txt
    - \* freqres\_band1\_20dB\_10k-100k.txt
    - \* freqres\_band1\_20dB\_1k-10k.txt
    - \* freqres\_band1\_40dB\_10-1k.txt
    - \* freqres\_band1\_40dB\_100k-1M.txt
    - \* freqres\_band1\_40dB\_10k-100k.txt
    - \* freqres\_band1\_40dB\_1k-10k.txt
    - \* freqres\_band1\_40dB\_1k-2k.txt
    - \* freqres\_band2\_0dB\_10-1k.txt
    - \* freqres\_band2\_0dB\_100k-1M.txt
    - \* freqres\_band2\_0dB\_10k-100k.txt
    - \* freqres\_band2\_0dB\_1k-10k.txt
    - \* freqres\_band2\_20dB\_10-1k.txt
    - \* freqres\_band2\_20dB\_100k-1M.txt
    - \* freqres\_band2\_20dB\_10k-100k.txt
    - \* freqres\_band2\_20dB\_1k-10k.txt
    - \* freqres\_band2\_40dB\_10-1k.txt

- \* freqres\_band2\_40dB\_100k-1M.txt
- \* freqres\_band2\_40dB\_10k-100k.txt
- \* freqres\_band2\_40dB\_1k-10k.txt
- \* freqres\_band3\_0dB\_10-1k.txt
- \* freqres\_band3\_0dB\_100k-1M.txt
- \* freqres\_band3\_0dB\_10k-100k.txt
- \* freqres\_band3\_0dB\_1k-10k.txt
- \* freqres\_band3\_20dB\_10-1k.txt
- \* freqres\_band3\_20dB\_100k-1M.txt
- \* freqres\_band3\_20dB\_10k-100k.txt
- \* freqres\_band3\_20dB\_1k-10k.txt
- \* freqres\_band3\_40dB\_10-1k.txt
- \* freqres\_band3\_40dB\_100k-1M.txt
- \* freqres\_band3\_40dB\_10k-100k.txt
- \* freqres\_band3\_40dB\_1k-10k.txt

– figure8

- \* noise\_band1\_0dB\_10-1k.txt
- \* noise\_band1\_0dB\_100k-1M.txt
- \* noise\_band1\_0dB\_10k-100k.txt
- \* noise\_band1\_0dB\_1k-10k.txt
- \* noise\_band1\_20dB\_10-1k.txt
- \* noise\_band1\_20dB\_100k-1M.txt
- \* noise\_band1\_20dB\_10k-100k.txt
- \* noise\_band1\_20dB\_1k-10k.txt
- \* noise\_band1\_40dB\_10-1k.txt
- \* noise\_band1\_40dB\_100k-1M.txt
- \* noise\_band1\_40dB\_10k-100k.txt
- \* noise\_band1\_40dB\_1k-10k.txt
- \* noise\_band2\_0dB\_10-1k.txt
- \* noise\_band2\_0dB\_100k-1M.txt
- \* noise\_band2\_0dB\_10k-100k.txt
- \* noise\_band2\_0dB\_1k-10k.txt
- \* noise\_band2\_20dB\_10-1k.txt
- \* noise\_band2\_20dB\_100k-1M.txt
- \* noise\_band2\_20dB\_10k-100k.txt
- \* noise\_band2\_20dB\_1k-10k.txt
- \* noise\_band2\_40dB\_10-1k.txt
- \* noise\_band2\_40dB\_100k-1M.txt
- \* noise\_band2\_40dB\_10k-100k.txt
- \* noise\_band2\_40dB\_1k-10k.txt
- \* noise\_band3\_0dB\_10-1k.txt
- \* noise\_band3\_0dB\_100k-1M.txt
- \* noise\_band3\_0dB\_10k-100k.txt
- \* noise\_band3\_0dB\_1k-10k.txt
- \* noise\_band3\_20dB\_10-1k.txt
- \* noise\_band3\_20dB\_100k-1M.txt
- \* noise\_band3\_20dB\_10k-100k.txt

- \* noise\_band3\_20dB\_1k-10k.txt
- \* noise\_band3\_40dB\_10-1k.txt
- \* noise\_band3\_40dB\_100k-1M.txt
- \* noise\_band3\_40dB\_10k-100k.txt
- \* noise\_band3\_40dB\_1k-10k.txt

The copyright of individual parts of the supplement might differ from the CC-BY 3.0 licence.
